# Supplementary material for: Racial Differences in the Rate of Change in Anterior Lamina Cribrosa Surface Depth in the African Descent and Glaucoma Evaluation Study
Source: PubMed Central journal article supplement (PMC8039570; doi:10.1167/iovs.62.4.12), 2021-04-12
Supplement: iovs-62-4-12_s001.pdf [file iovs-62-4-12_s001.pdf]

**Table 5 (appendix):** Longitudinal multivariable linear mixed model for Anterior Cribrosa Surface Depth defined by Bruch’s Membrane Opening over time adjusting for choroidal thickness

|                                          | <b>Estimate</b> | <b>Std. Error</b> | <b>95% CI</b>     | <b>p-value</b>   |
|------------------------------------------|-----------------|-------------------|-------------------|------------------|
| (Intercept)                              | 431.88          | 161.36            | (115.62, 748.14)  | <b>0.008</b>     |
| Age                                      | -2.75           | 1.03              | (-4.77, -0.72)    | <b>0.009</b>     |
| Gender: Male                             | 67.87           | 22.05             | (24.67, 111.08)   | <b>0.002</b>     |
| Race: European Descent                   | -68.27          | 22.62             | (-112.61, -23.92) | <b>0.003</b>     |
| VF                                       | 0.12            | 0.18              | (-0.23, 0.47)     | 0.507            |
| Disc Area                                | 58.18           | 21.56             | (15.91, 100.44)   | <b>0.008</b>     |
| Maximum IOP                              | 6.09            | 2.66              | (0.88, 11.30)     | <b>0.023</b>     |
| CCT                                      | -0.12           | 0.28              | (-0.67, 0.43)     | 0.672            |
| Time (Years)                             | 0.70            | 0.18              | (0.35, 1.06)      | <b>&lt;0.001</b> |
| Time (Years) X Race:<br>European Descent | 3.00            | 0.80              | (1.44, 4.57)      | <b>&lt;0.001</b> |

Abbreviations: ALCSD, anterior lamina cribrosa surface depth VF MD, visual field mean deviation; SE, spherical equivalent; AL, axial length; IOP, intraocular pressure; CCT, central corneal thickness

**Table 6 (appendix):** Main effect and interaction estimates from longitudinal linear mixed models associating anterior lamina cribrosa surface depth (ALCSD) using only one randomly selected eye per patient with a) each variable of interest and time included as independent variables and b) each variable of interest, time, and their interaction included as independent variables.

| <b>Longitudinal ALCSD, univariable models</b> |                          |                |                            |                |
|-----------------------------------------------|--------------------------|----------------|----------------------------|----------------|
|                                               | <b>A) Main Effect</b>    | <b>p-value</b> | <b>B) Time Interaction</b> | <b>p-value</b> |
| Age                                           | -2.91 (-5.12, -0.69)     | <b>0.011</b>   | 0.00 (-0.13, 0.14)         | 0.951          |
| Gender: Male                                  | 73.77 (23.16, 124.39)    | <b>0.005</b>   | -0.15 (-3.15, 2.85)        | 0.922          |
| Race: European Descent                        | -62.96 (-114.08, -11.83) | <b>0.017</b>   | 3.08 (0.12, 6.04)          | <b>0.044</b>   |
| VFbase                                        | 0.32 (-0.17, 0.80)       | 0.204          | -0.02 (-0.21, 0.17)        | 0.839          |
| SE                                            | -4.29 (-18.79, 10.22)    | 0.564          | 0.25 (-0.58, 1.08)         | 0.557          |
| AL                                            | 24.40 (0.21, 48.60)      | 0.050          | 0.23 (-1.19, 1.65)         | 0.751          |
| Disc Area                                     | 64.63 (15.43, 113.84)    | <b>0.011</b>   | -0.02 (-3.08, 3.03)        | 0.987          |
| IOP                                           | -0.08 (-0.43, 0.26)      | 0.637          | 0.08 (-0.20, 0.35)         | 0.571          |
| Maximum IOP                                   | 6.66 (0.73, 12.58)       | <b>0.030</b>   | -0.03 (-0.38, 0.31)        | 0.848          |
| CCT                                           | -0.04 (-0.70, 0.61)      | 0.899          | 0.01 (-0.02, 0.05)         | 0.516          |

Abbreviations: VFbase, visual field mean deviation at baseline; SE, spherical equivalent; AL, axial length; IOP, intraocular pressure; IOPbase, intraocular pressure at baseline; CCT, central corneal thickness. Bold p-values are significant

**Table 7 (appendix):** Longitudinal multivariate model associating anterior lamina cribrosa surface depth (ALCSD) using only one randomly selected eye per patient with all the variables of interest with significant association as univariates (see Table 3).

|                                          | <b>Estimate</b> | <b>Std. Error</b> | <b>95% CI</b>    | <b>p-value</b> |
|------------------------------------------|-----------------|-------------------|------------------|----------------|
| (Intercept)                              | 502.43          | 191.93            | (126.26, 878.60) | <b>0.010</b>   |
| Age                                      | -2.48           | 1.09              | (-4.62, -0.33)   | <b>0.025</b>   |
| Gender: Male                             | 69.85           | 25.03             | (20.80, 118.90)  | <b>0.006</b>   |
| Race: European Descent                   | -41.14          | 25.68             | (-91.46, 9.19)   | 0.112          |
| VF                                       | 0.32            | 0.25              | (-0.17, 0.81)    | 0.196          |
| Disc Area                                | 59.2            | 23.66             | (12.83, 105.58)  | <b>0.014</b>   |
| Maximum IOP                              | 5.78            | 2.94              | (0.03, 11.53)    | 0.051          |
| CCT                                      | -0.38           | 0.32              | (-1.01, 0.25)    | 0.238          |
| Time (Years)                             | 2.75            | 0.98              | (0.84, 4.67)     | <b>0.006</b>   |
| Time (Years) X Race:<br>European Descent | 3.14            | 1.5               | (0.19, 6.09)     | <b>0.039</b>   |

Abbreviations: VF, visual field mean deviation; SE, spherical equivalent; AL, axial length; IOP, intraocular pressure; CCT, central corneal thickness. Bold p-values are significant; bold italic approaching significance.
